# Supplementary material for: Micropatterning Decellularized ECM as a Bioactive Surface to Guide Cell Alignment, Proliferation, and Migration
Source: Bioengineering (Basel). 2020 Aug 31;7(3):102. doi: 10.3390/bioengineering7030102 (PMC7552701; doi:10.3390/bioengineering7030102)
Supplement: Supplementary file 1 [file bioengineering-07-00102-s001.pdf]

## Supplemental Figures

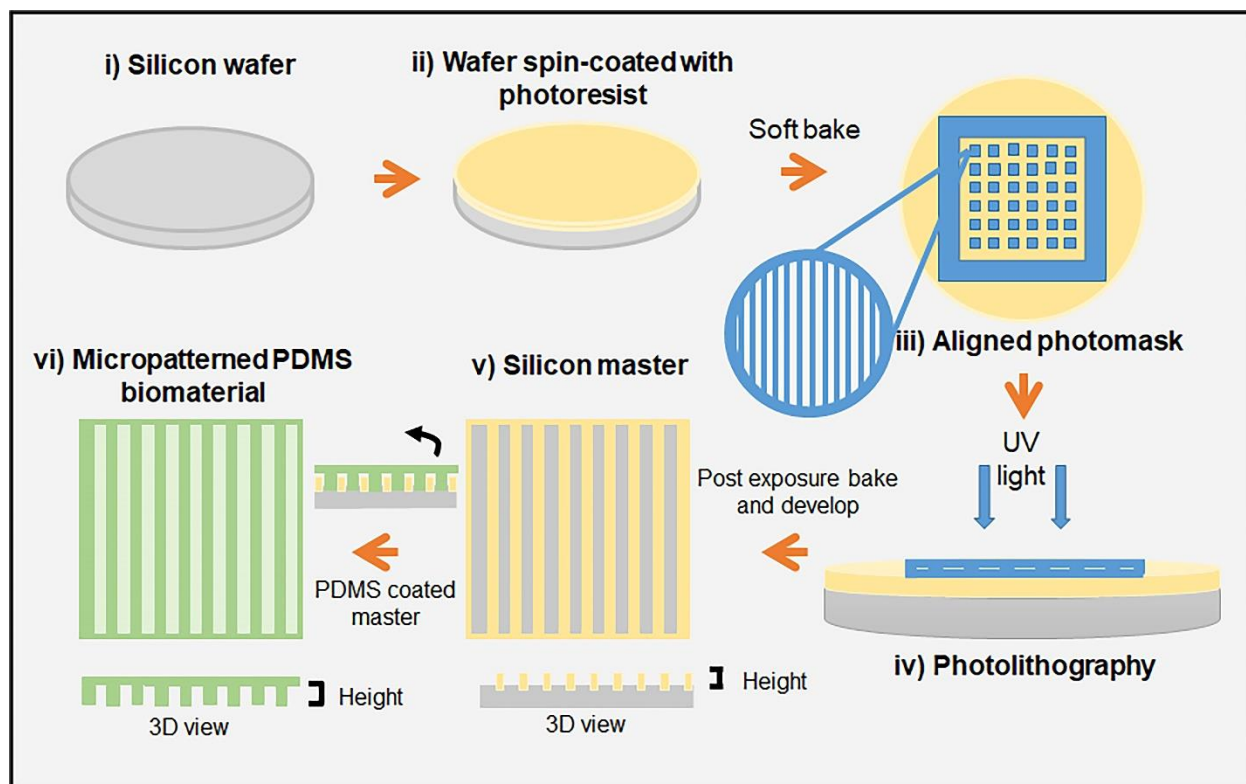

**Figure S1.** Soft lithography protocol for fabrication of micropatterned PDMS biomaterial. The photoresist viscosity and parameters for spin-coating speed, soft bake temperature, photolithography exposure, and post exposure temperature were dependent on the desired three-dimensional pattern height.

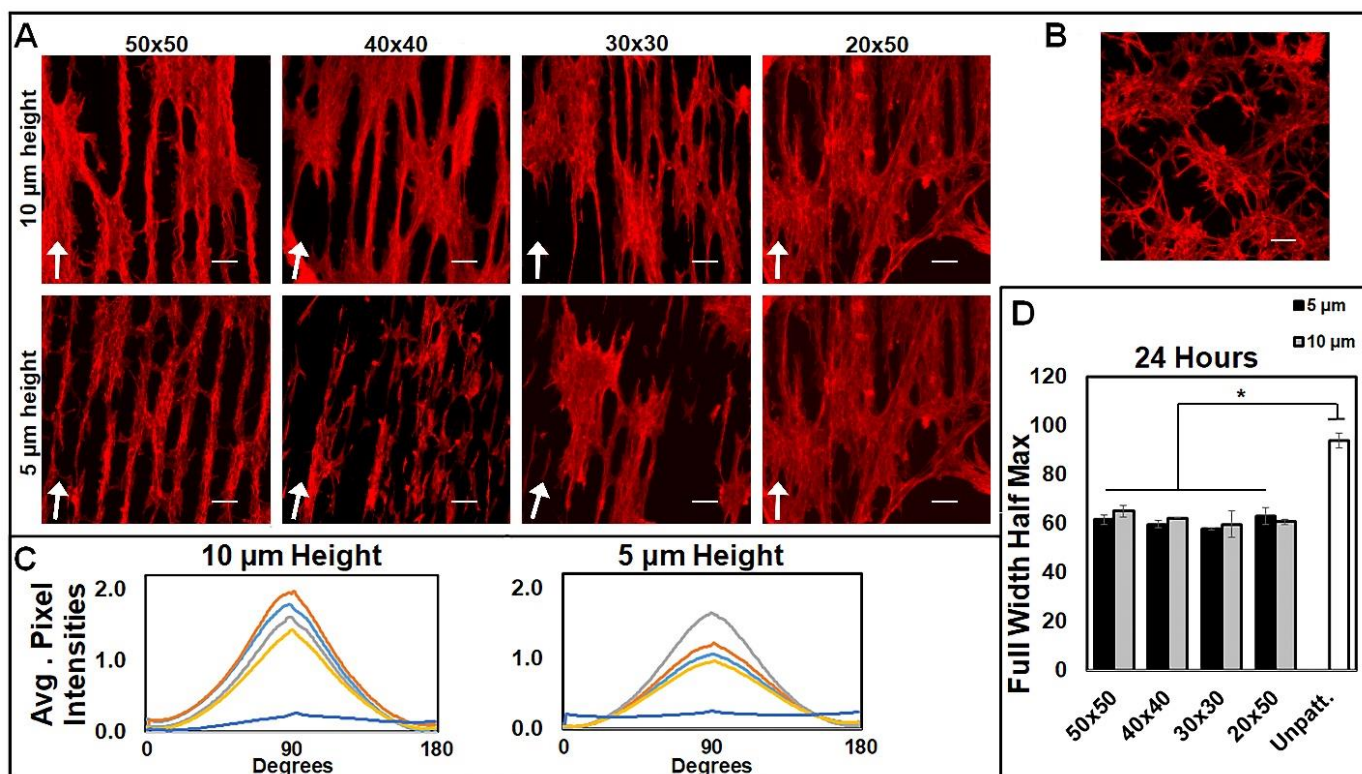

**Figure S2.** Cell alignment following 24 hours of culture. Cells were cultured on (A) patterned and (B) unpatterned PDMS for 24 hours and visualized using rhodamine-phalloidin, where white arrows indicate pattern direction. Scale bar = 100  $\mu\text{m}$ . (C) FFT analysis quantified alignment of 24-hour cell culture on substrates. (D) Full width half maximum values derived from average pixel intensity curves.  $n = 3$  unique trials for each condition were performed. Data are presented as mean  $\pm$  SE, where \*  $\leq p < 0.05$ , \*\*  $p \leq 0.005$ , and \*\*\*  $p \leq 0.0005$ .

| <b>Dimensions</b>   | <b>10 <math>\mu\text{m}</math></b> | <b>5 <math>\mu\text{m}</math></b> |
|---------------------|------------------------------------|-----------------------------------|
| <b>Height</b>       | 10.3 $\pm$ 0.1                     | 5.3 $\pm$ 0.2                     |
| <b>50x50 Ridge</b>  | 50.3 $\pm$ 0.9                     | 49.9 $\pm$ 0.4                    |
| <b>50x50 Trough</b> | 50.8 $\pm$ 0.9                     | 50.4 $\pm$ 0.7                    |
| <b>40x40 Ridge</b>  | 39.2 $\pm$ 0.8                     | 40.3 $\pm$ 0.3                    |
| <b>40x40 Trough</b> | 41.9 $\pm$ 0.6                     | 41. $\pm$ 1                       |
| <b>30x30 Ridge</b>  | 30.4 $\pm$ 0.7                     | 29.2 $\pm$ 0.2                    |
| <b>30x30 Trough</b> | 30.5 $\pm$ 0.7                     | 31.2 $\pm$ 0.3                    |
| <b>20x50 Ridge</b>  | 21.6 $\pm$ 0.4                     | 20.7 $\pm$ 0.3                    |
| <b>20x50 Trough</b> | 50.9 $\pm$ 0.8                     | 49. $\pm$ 2                       |

**Table S1.** Ridge and trough dimensions of PDMS substrates as verified across three unique surfaces, n > 100 measurements per dimension.
